# Supplementary figures and images for: Assisted large fragment insertion by Red/ET-recombination (ALFIRE)—an alternative and enhanced method for large fragment recombineering
Source: PubMed Central journal article supplement — Nucleic Acids Res. 2007 May 21;35(10):e78. doi: 10.1093/nar/gkm250 (PMC1904275; doi:10.1093/nar/gkm250), 2007-05-21

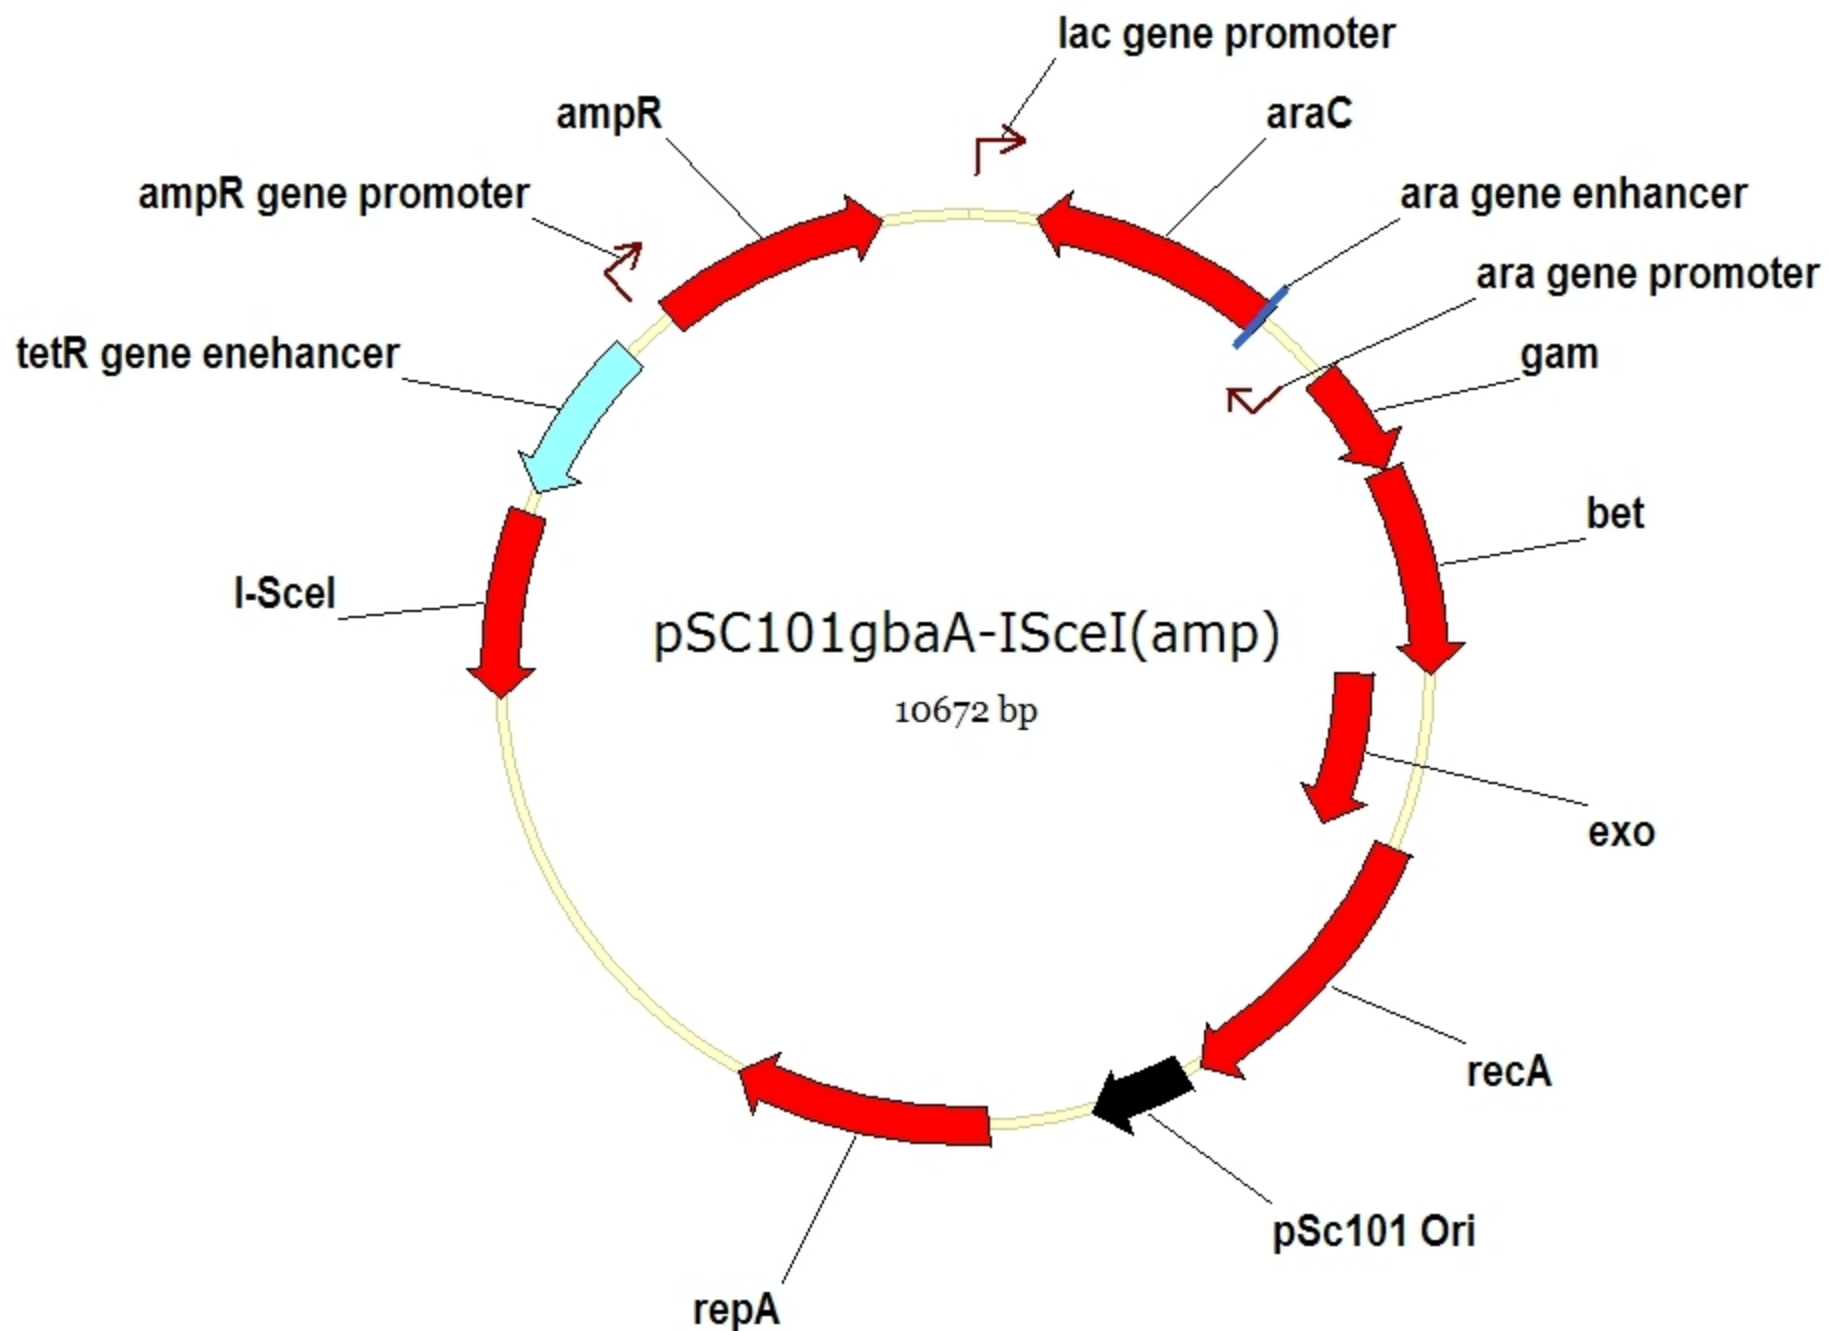

Supplement: nar_gkm250_1.pdf [file nar_gkm250_1.pdf]
